# Supplementary material for: Angiography-based hemodynamic features predict recurrent ischemic events after angioplasty and stenting of intracranial vertebrobasilar atherosclerotic stenosis
Source: Springer Nature journal article supplement (doi:10.1007/s00330-023-10209-x), 2023-09-19
Supplement: MOESM1 [file 26059566]

# Angiography-based hemodynamic features predict recurrent ischemic events after angioplasty and stenting of intracranial vertebrobasilar atherosclerotic stenosis

## Electronic Supplementary Material

**Supplemental Figure 1:** The flow chart of patient selection in this study.

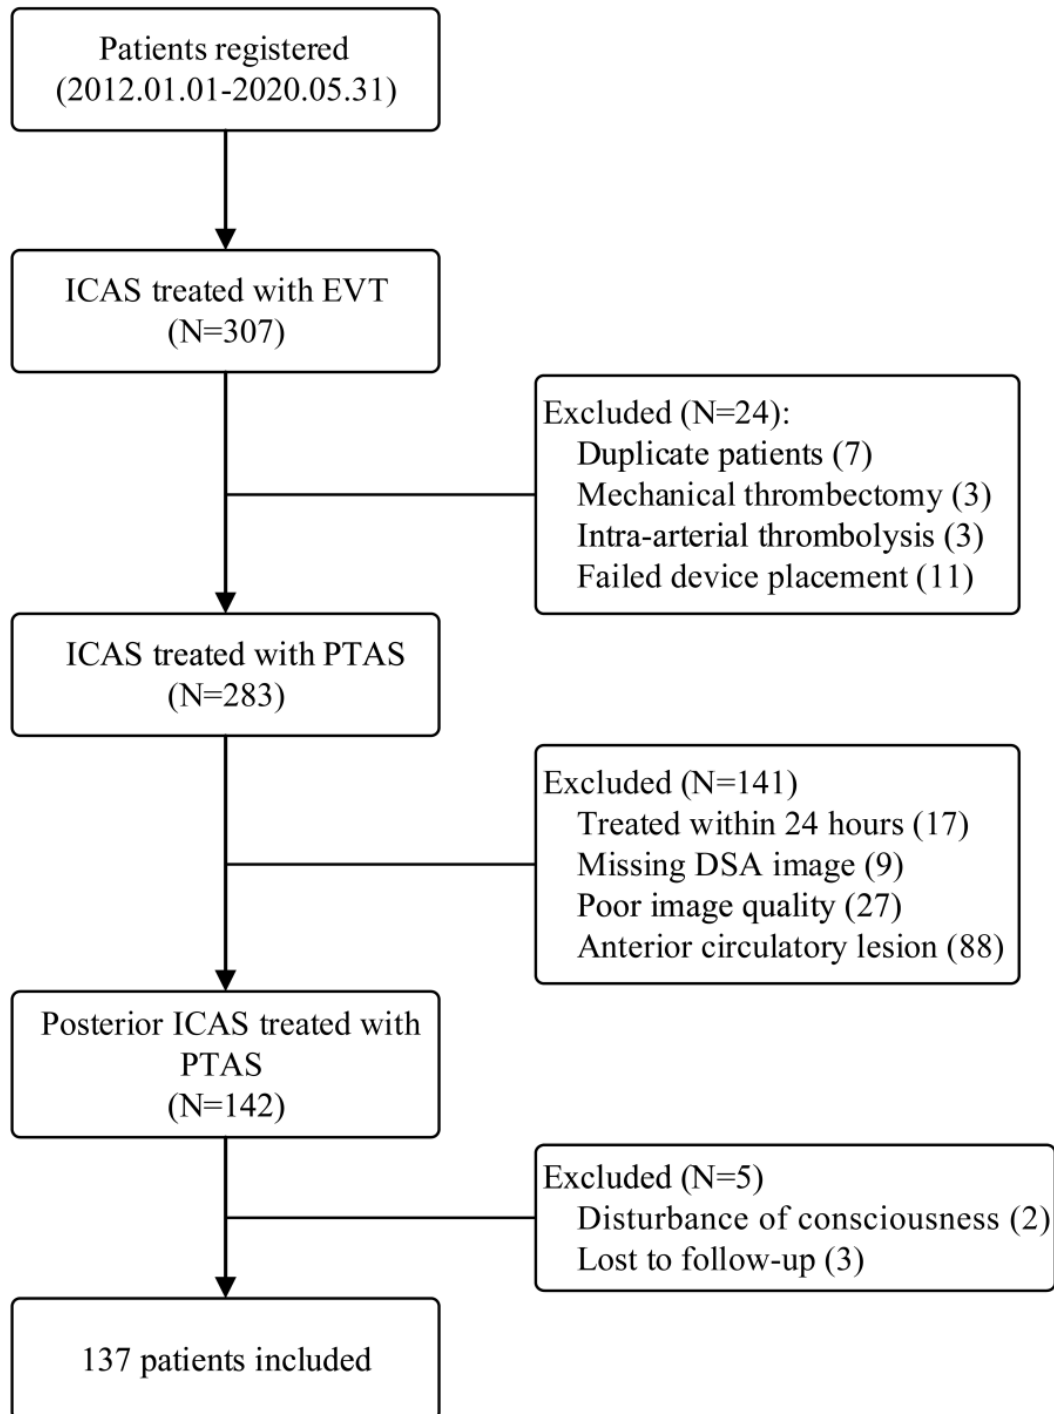

Abbreviations: EVT, endovascular therapy; PTAS, percutaneous transluminal angioplasty and stenting; DSA, digital subtraction angiography.
